# Supplementary material for: Mechanism of ATP hydrolysis dependent rotation of bacterial ATP synthase
Source: PubMed Central journal article supplement (PMC10333338; doi:10.1038/s41467-023-39742-5), 2023-07-10
Supplement: 41467_2023_39742_MOESM1_ESM.pdf [file 41467_2023_39742_MOESM1_ESM.pdf]

# Supplementary Fig.1

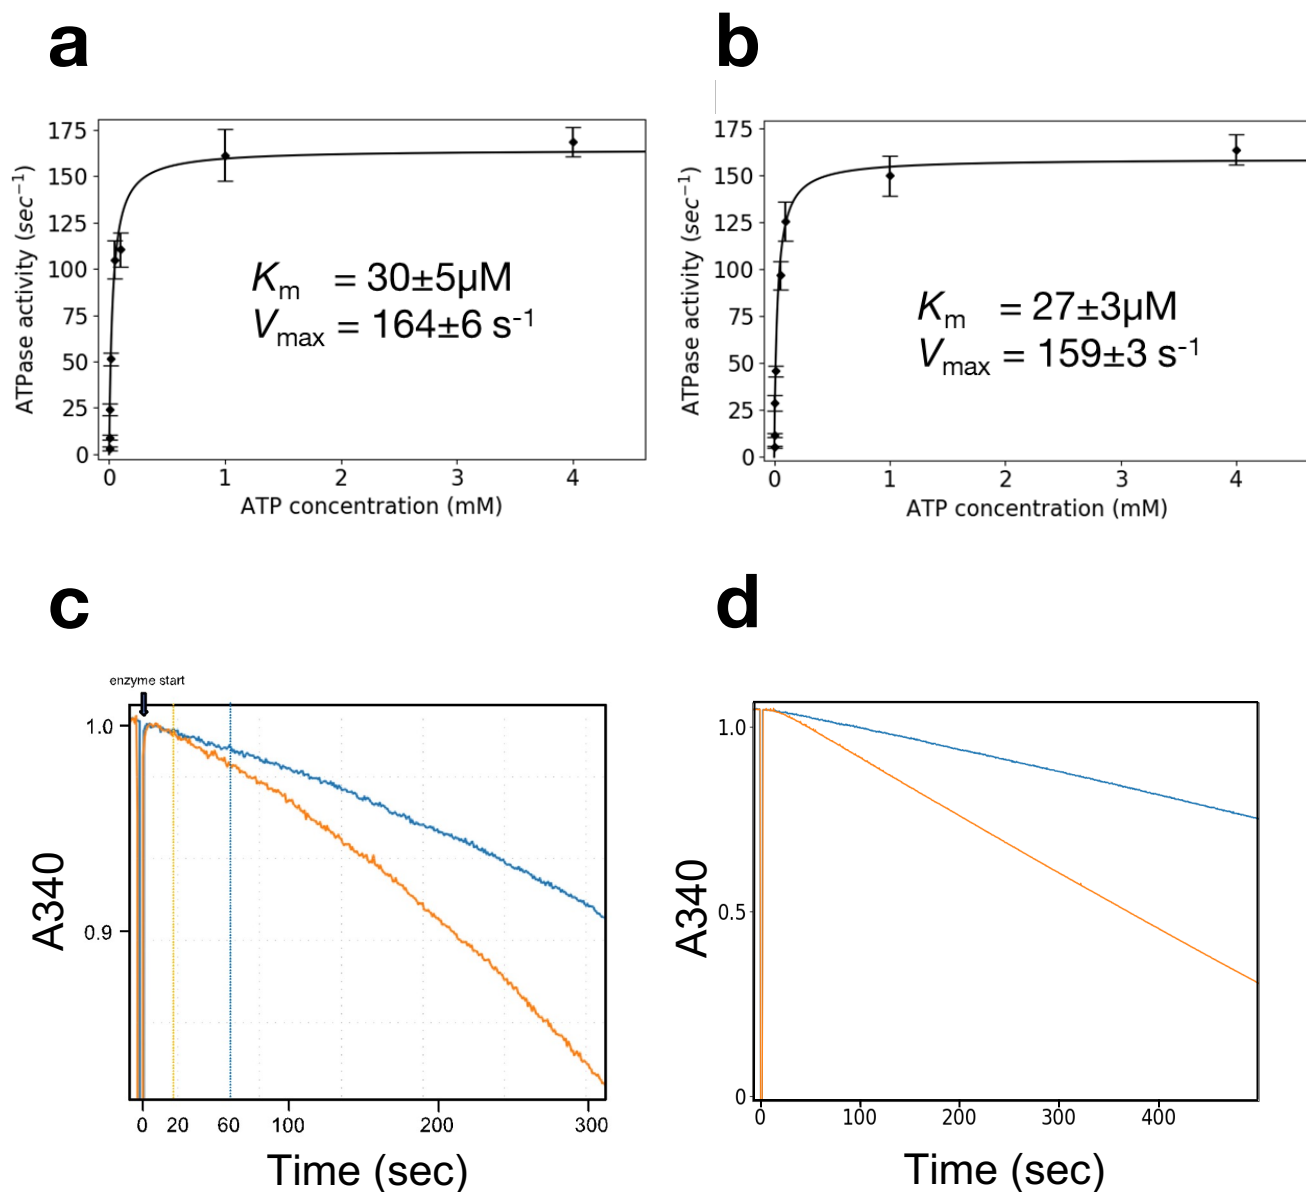

**Supplementary Figure 1.** Enzymatic properties of  $\Delta\epsilon\text{CT-F}_0\text{F}_1$ . **a** Michaelis Menten curves showing the ATPase activity of  $\Delta\epsilon\text{CT-F}_0\text{F}_1$  with enzyme kinetics parameters of  $K_m = 30 \mu\text{M}$  and  $V_{\text{max}} = 164 \text{ s}^{-1}$ . **b** Michaelis Menten curves showing the ATPase activity of nucleotide-depleted  $\Delta\epsilon\text{CT-F}_0\text{F}_1$  with enzyme kinetics parameters of  $K_m = 27 \mu\text{M}$  and  $V_{\text{max}} = 159 \text{ s}^{-1}$ . Three measurements were repeated at each concentration and the points are the average of the three experimental values. Error bars represent the standard deviation of ATPase activity from the mean. **c** Comparison of ATPase activity of  $\Delta\epsilon\text{CT-F}_0\text{F}_1$  at  $25 \mu\text{M}$  ATP (blue) and  $26 \text{ mM}$  ATP (orange). Measurements of ATPase activity were described in Methods section. Arrows represents the reaction time at low or high [ATP] condition, respectively. **d** ATPase activity of  $\Delta\epsilon\text{CT-F}_0\text{F}_1$  at  $26 \text{ mM}$  ATP-Mg, in the presence of  $0.1\%$  LDAO (orange) and without LDAO (blue).

**a**

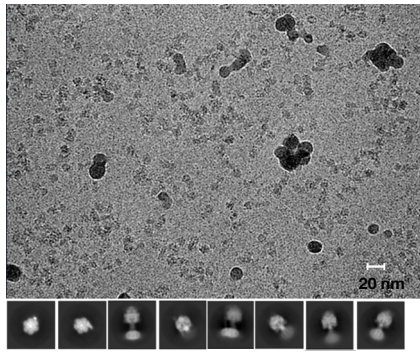

**b**

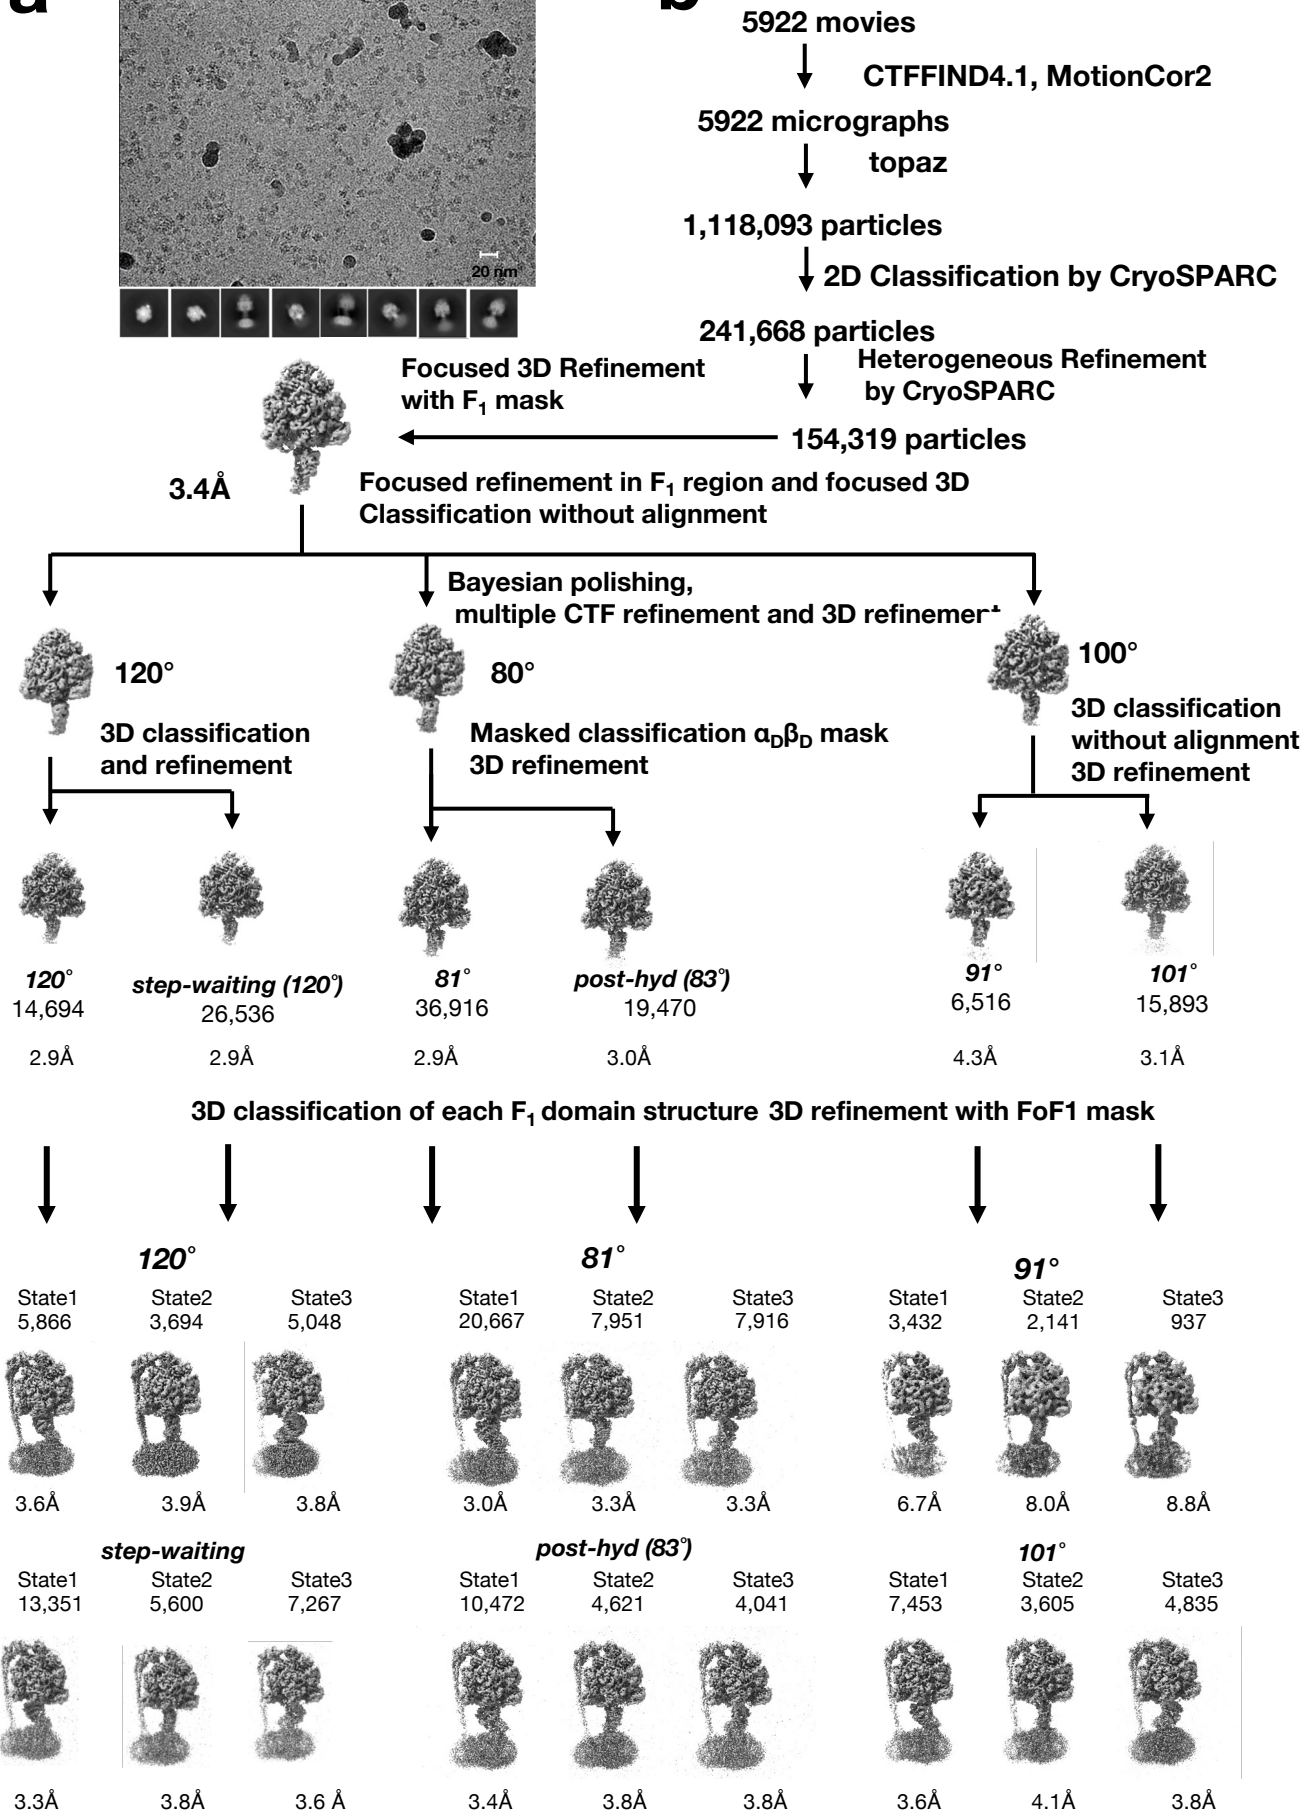

**C**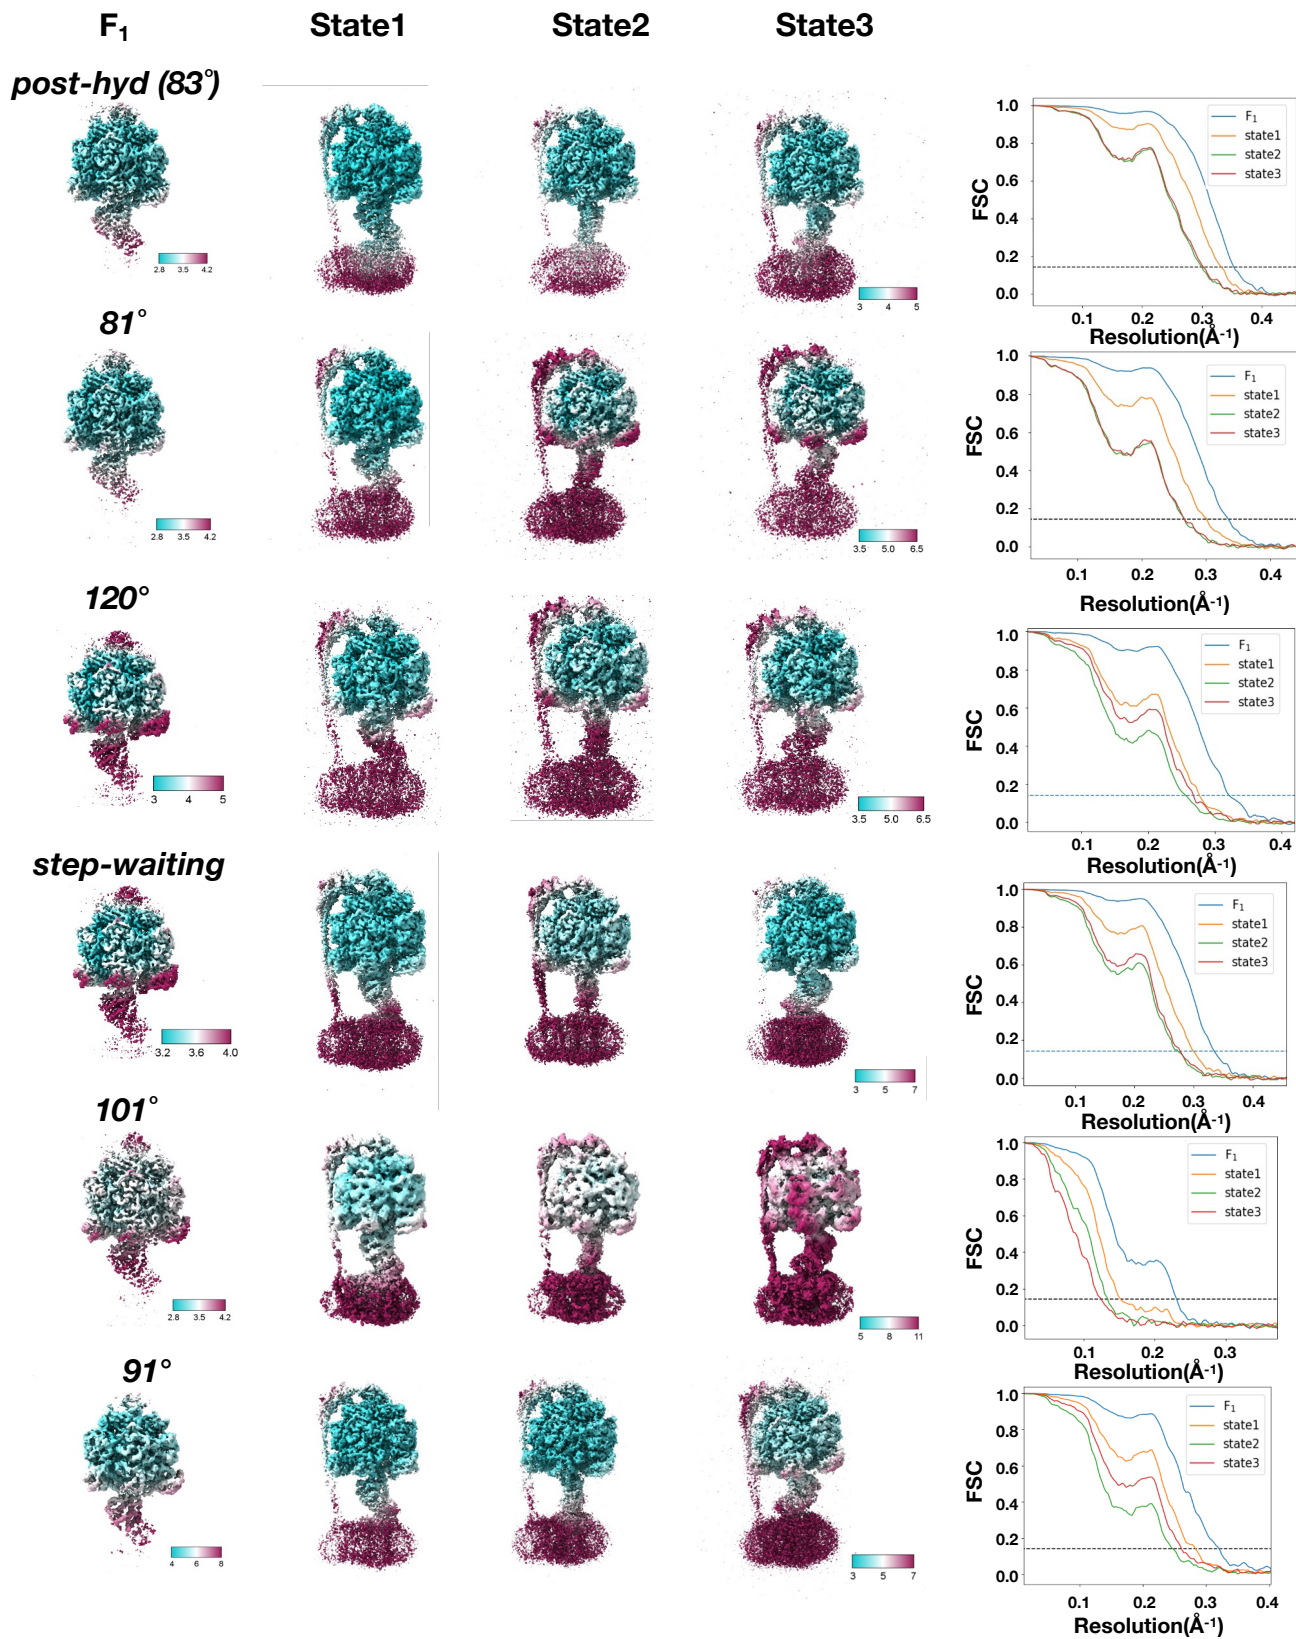

**Supplementary Figure 2** Flow charts describing image acquisition and structural analysis allowing reconstitution of the 3D structures of  $\Delta\epsilon CT-F_0F_1$  at 6 mM [ATP]. **a** A typical micrograph of  $\Delta\epsilon CT-F_0F_1$  at 26 mM [ATP](upper) and 2D classes (lower). **b** Flow chart of single particle analysis for  $\Delta\epsilon CT-F_0F_1$  at 26 mM [ATP]. The selected 154k particles were subjected to focused refinement in the  $F_1$  domain and focused 3D classification without alignment, resulting in three classes of  $120^\circ$ ,  $80^\circ$ , and  $100^\circ$  rotation of the  $\gamma$  subunit. After 3D classification of the  $120^\circ$  structure, two subclasses were obtained, termed  $120^\circ$  and *step-waiting*, respectively.  $81^\circ$  and *post-hyd* ( $83^\circ$ ) were identified by  $\alpha_D\beta_D$  masked classification of the  $80^\circ$  structure. From the particles of the  $100^\circ$  structure,  $91^\circ$  and  $101^\circ$  were obtained by 3D classification without alignment. The six intermediates ( $81^\circ$ , *pot-hyd*,  $91^\circ$ ,  $101^\circ$ ,  $120^\circ$ , and *step-waiting*) were subjected to further classification with a  $F_0F_1$  mask, resulting in three rotational states of six intermediates. **c** Resmaps of six intermediates of the three major rotational states. FSC curves for intermediates of  $F_1$  domain and  $F_0F_1$  are shown in the right hand panels.



Supplementary Fig.3

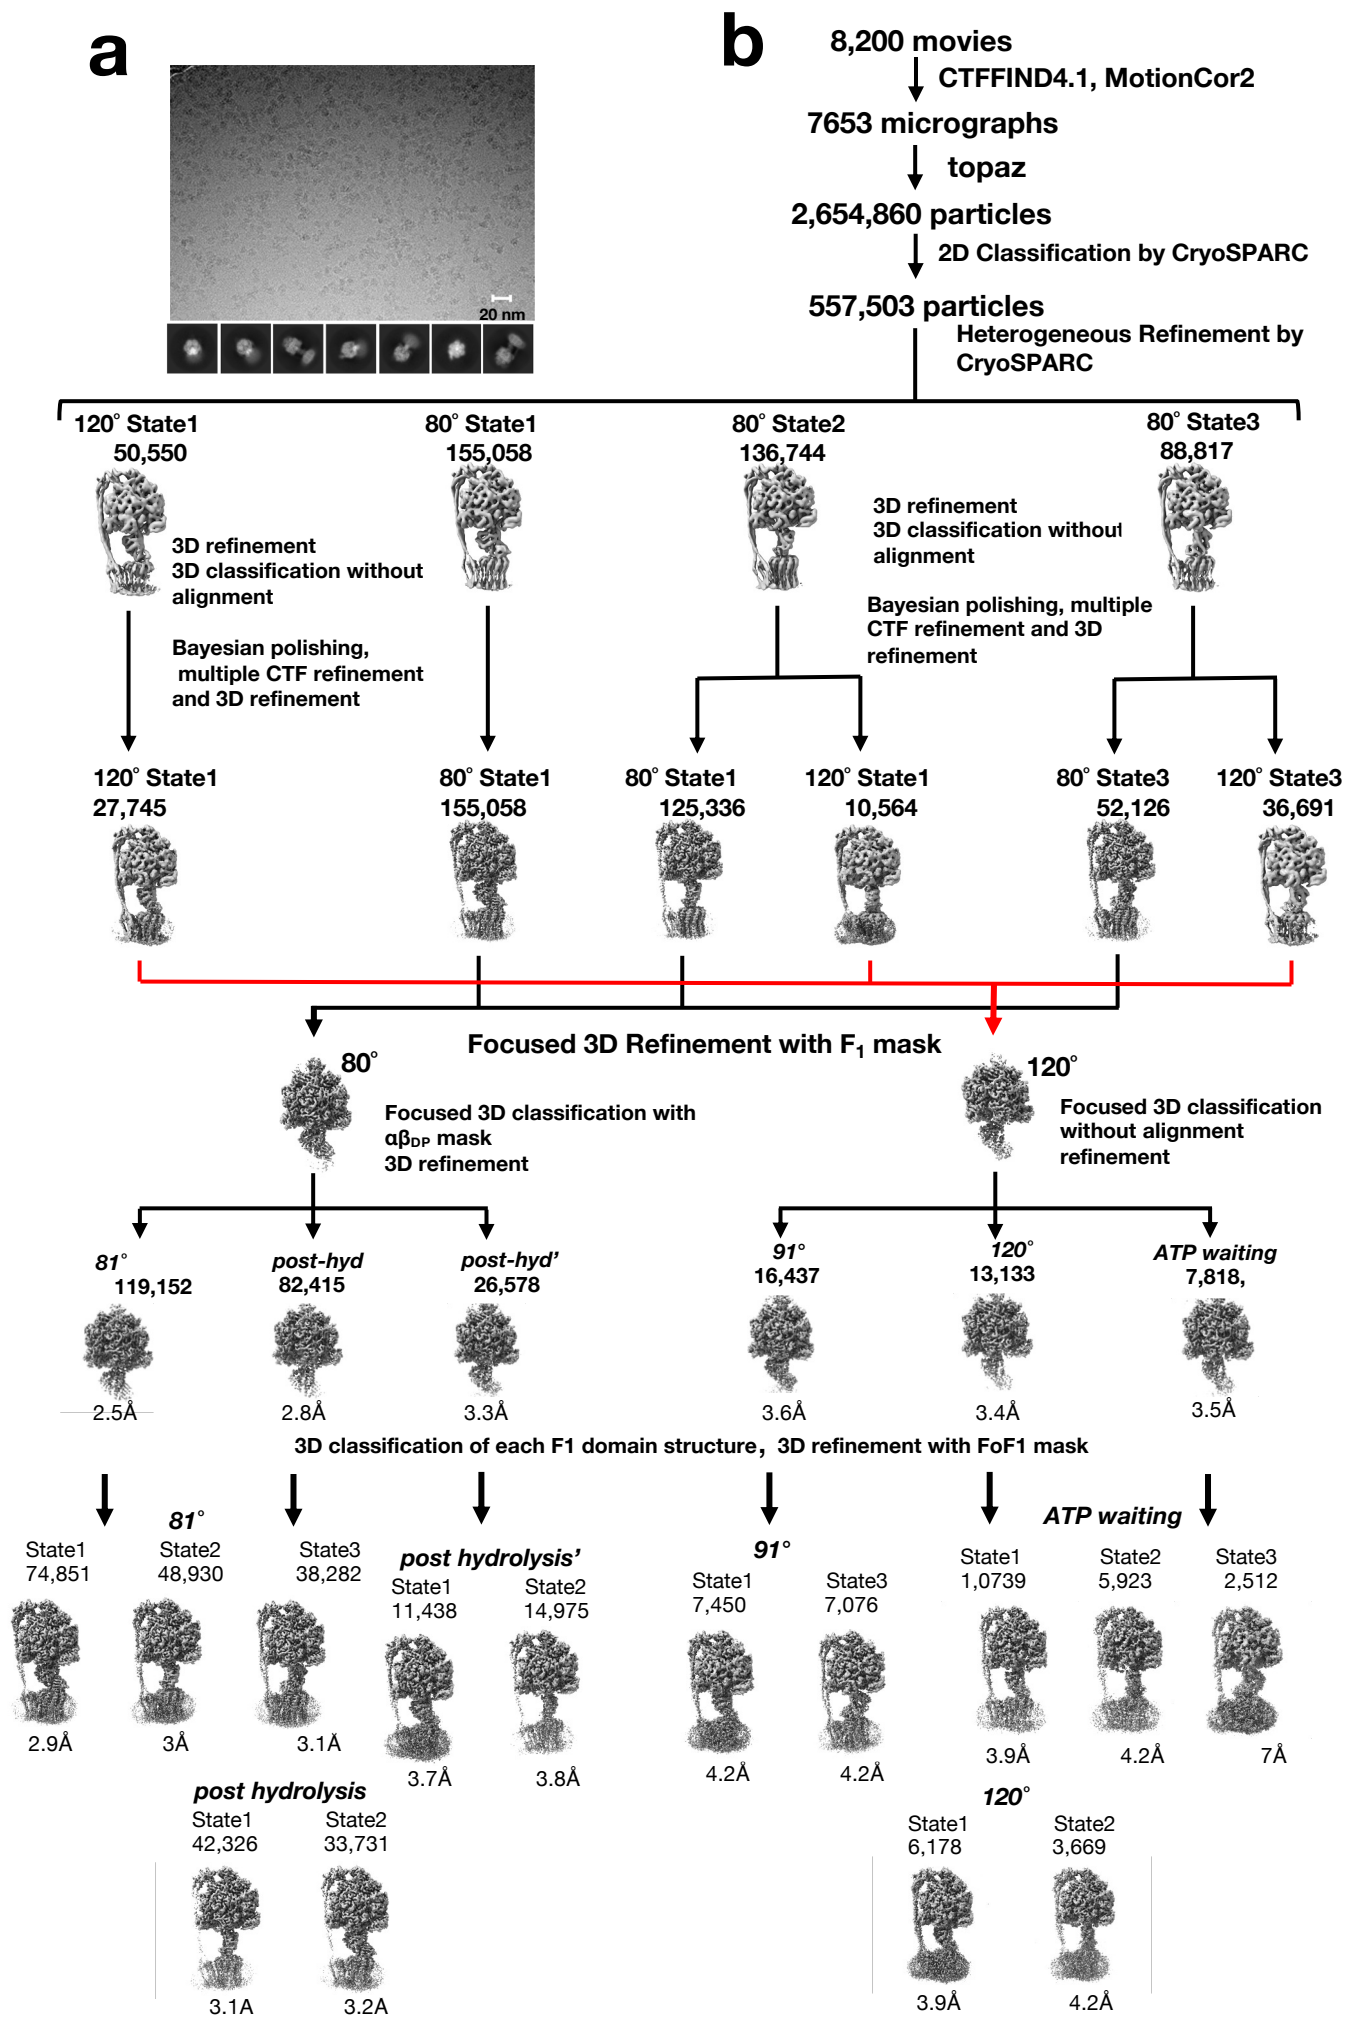

**C**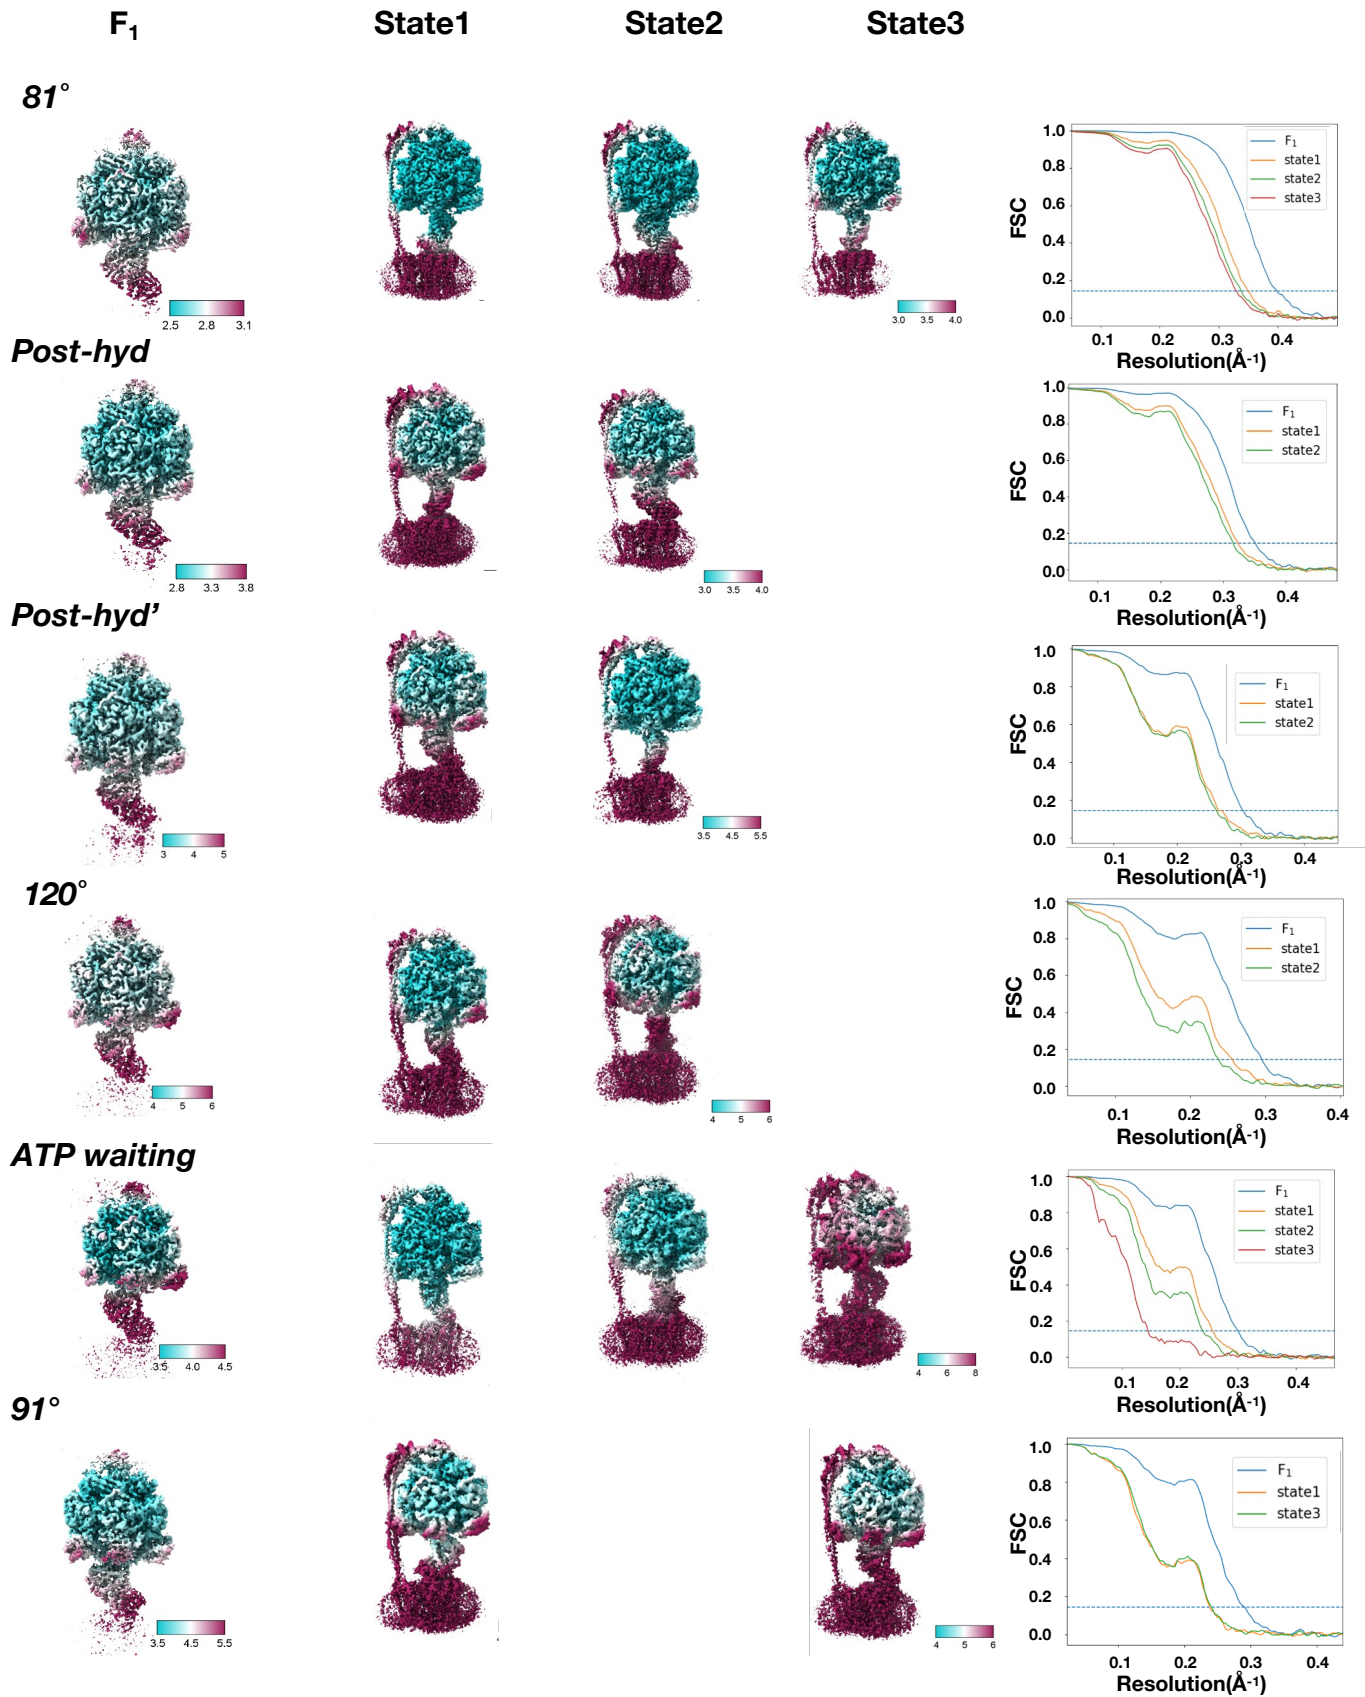

**Supplementary Figure 3.** Flow charts describing image acquisition and structural analysis allowing reconstitution of the 3D structures of  $\Delta\epsilon CT-F_0F_1$  at 25  $\mu M$  [ATP]. **a** A typical micrograph of  $\Delta\epsilon CT-F_0F_1$  at 25  $\mu M$  [ATP](upper) and the 2D classes (lower). **b** Flow chart of single particle analysis for  $\Delta\epsilon CT-F_0F_1$  at 25  $\mu M$  [ATP]. The Selected 557 k particles were subjected to heterogeneous refinement using CryoSparc. The resulting three 80° structures and one 120° structure were further classified, resulting in three 120° structures and three 80° structures. The particles of 120° and 80° structures were individually combined. The particles of 80° structure were subjected to focused 3D classification using a  $\alpha_D\beta_D$  mask, resulting in 81° and two *post-hyd* structures. The particles for the 120° structure were subjected to focused 3D classification without alignment, resulting in 91°, 120°, and *ATP waiting*. The  $F_0F_1$  particles of these six intermediates were subjected to further classification using a  $F_0F_1$  mask, respectively. Two or three rotational states for six intermediates were classified, respectively. **c** Resmaps of six intermediates of two or three rotational states, respectively. The FSC curves for the intermediates of the  $F_1$  domain and  $F_0F_1$  are shown in the right hand panels.

# Supplementary Fig.4

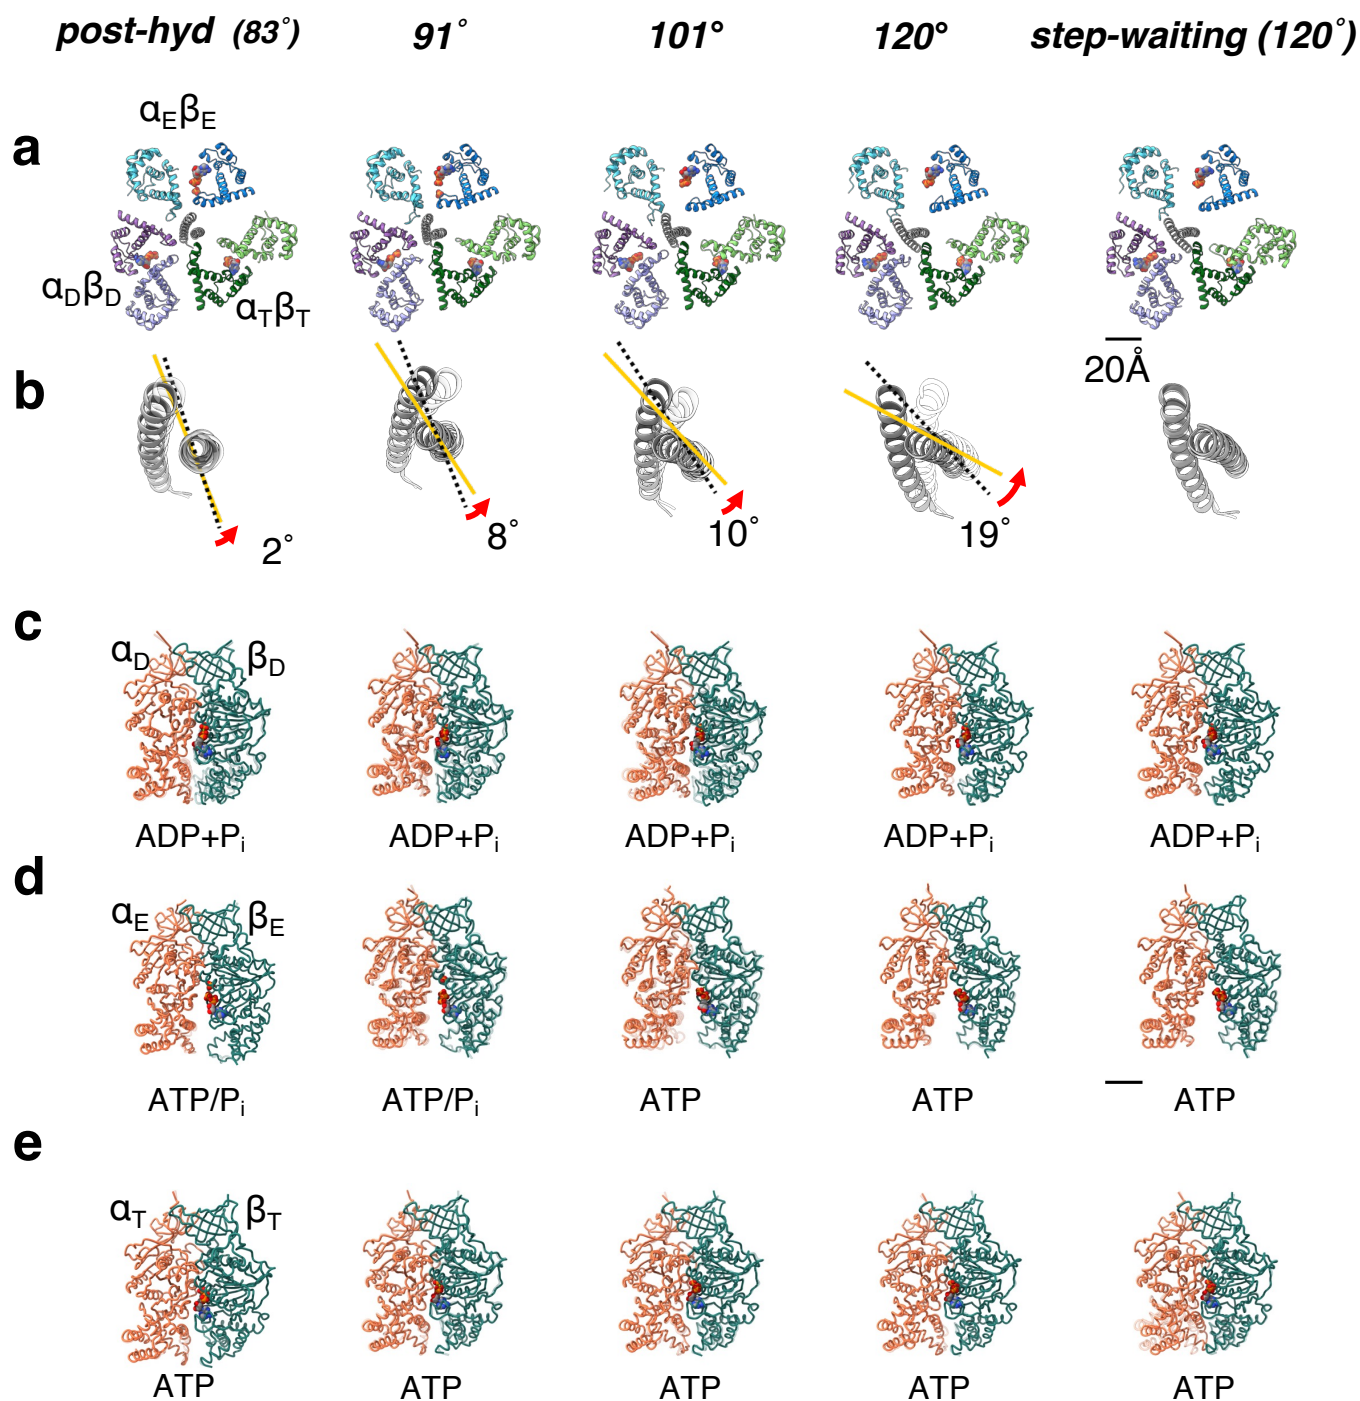

**Supplementary Figure 4. Structure of 5 intermediates captured during the 40° step at high [ATP].** **a** Cross section of F<sub>1</sub> domain at the catalytic site. Each catalytic dimer is shown in ribbon representation and colored as detailed in Figure 1. The bound nucleotides to  $\beta$  subunits are represented as spheres. **b** Rotation angle of the  $\gamma$  subunit relative to that of the 0° structure. The structure of the  $\gamma$  subunit at the previous rotation angle is shown in white. **c-e** Structure of  $\alpha\beta$  dimers;  $\alpha_D\beta_D$  (**c**),  $\alpha_E\beta_E$  (**d**),  $\alpha_T\beta_T$  (**e**). The bound nucleotide and Pi at the interface of each dimer is represented as spheres with the specific bound molecules labelled under the structures. The superimposed  $\alpha\beta$  dimers in previous angle are shown translucent, respectively.



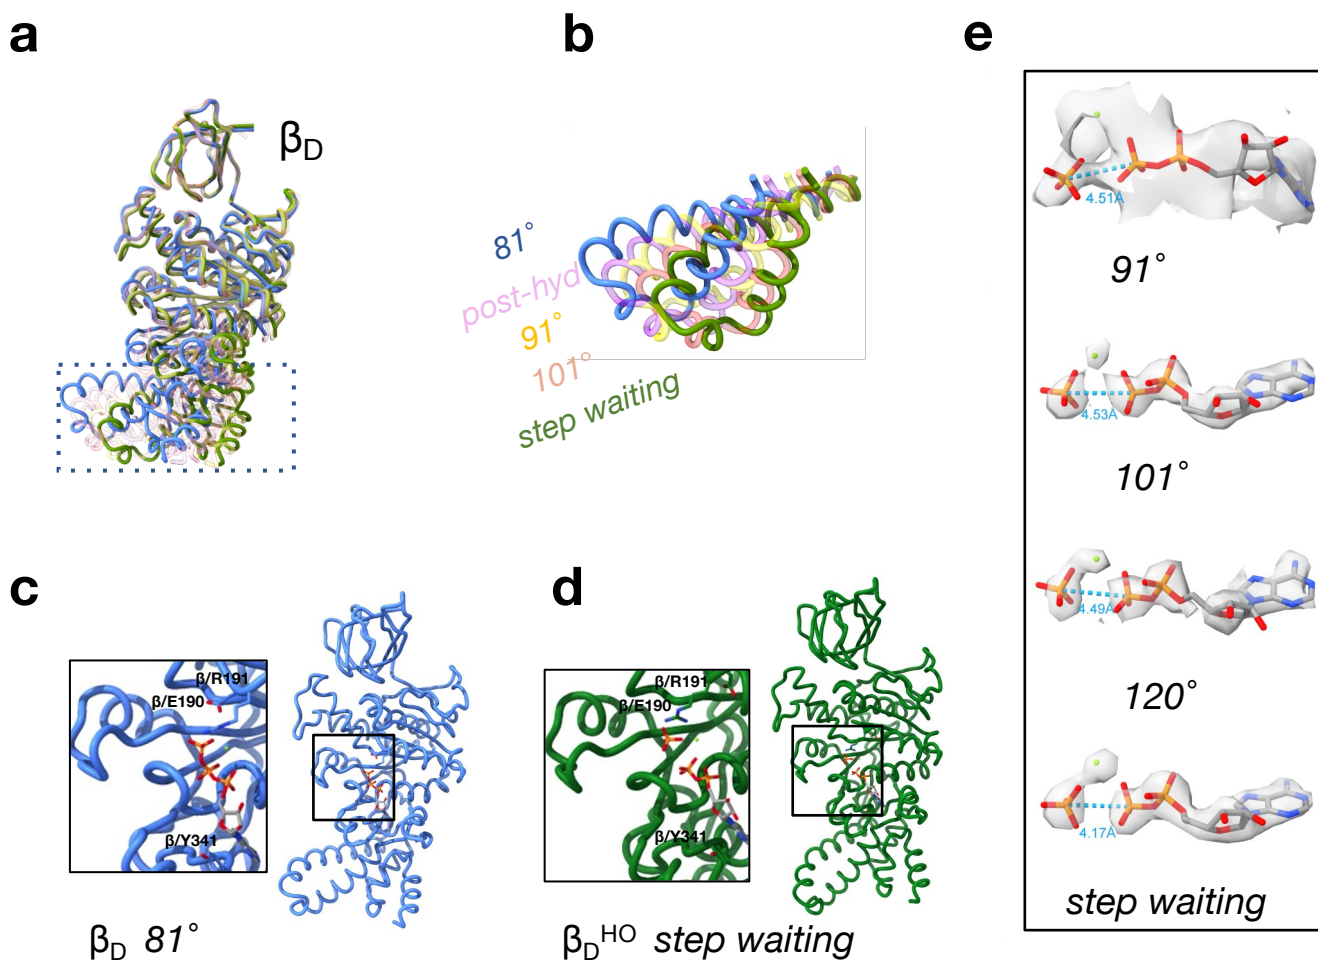

**Supplementary Figure 5.** Open motion of  $\alpha_D\beta_D$  upon ATP hydrolysis. **a** superimposition of  $\beta$  subunit in 81° with that in *post-hyd*, 91°, 101°, and *ATP waiting*. **b** motion of the *CT* loop helix domain in the conformation changes from 81° to *step-waiting*. Structure of  $\beta_D$  in 81° (**c**) and *step waiting structures* (**d**). The magnified views of the nucleotide binding site are shown in the left panels, respectively. ATP, ADP, Pi and coordinated amino acid residues are shown as sticks. **e** EM density of ATP/ADP+Pi bound to  $\alpha_D\beta_D$ , with the distance between  $\beta$ -phosphate and  $\gamma$ -phosphate or Pi indicated with a dotted line. Each nucleotide is represented by stick and magnesium ion by green sphere.



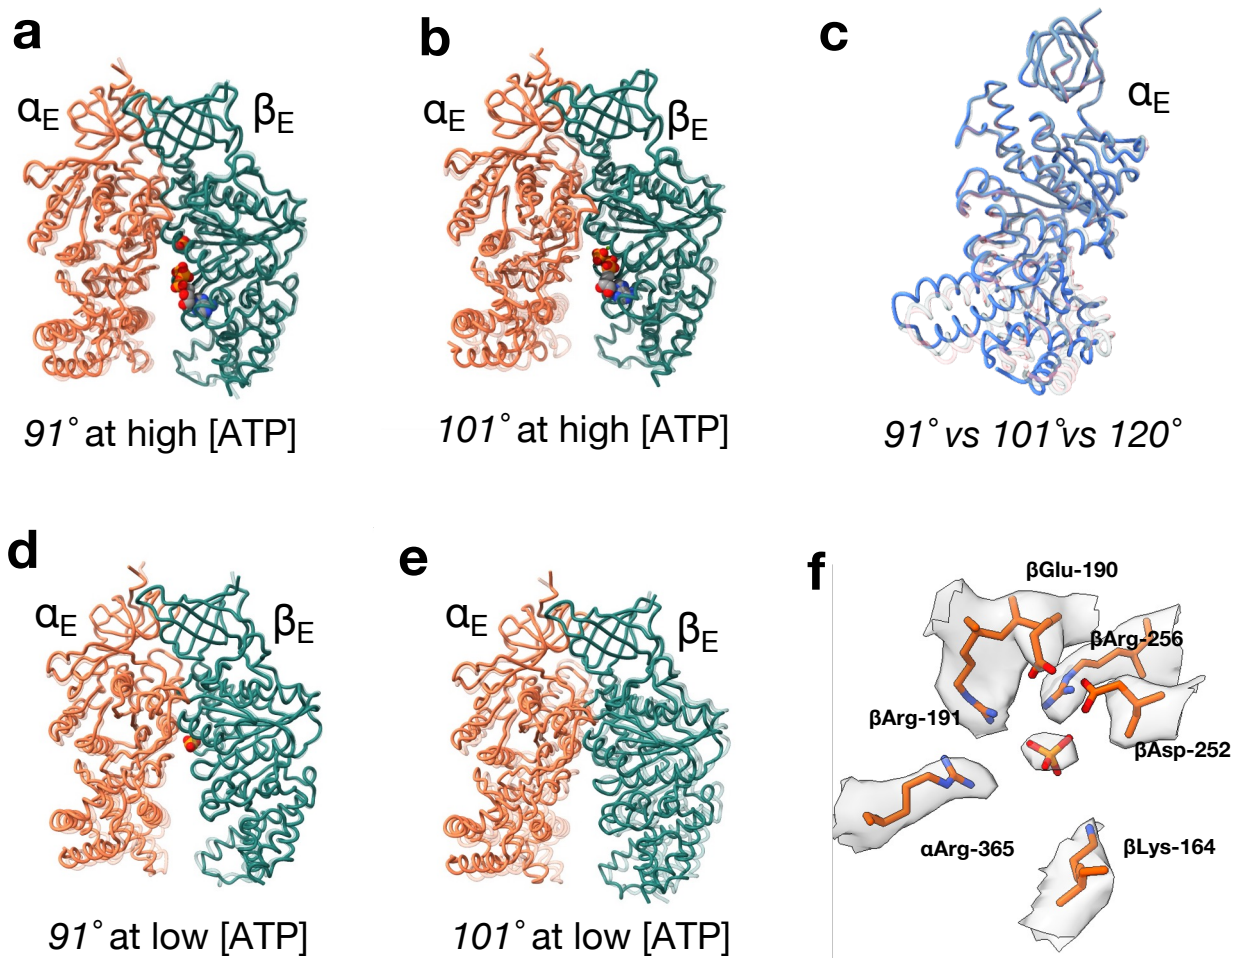

**Supplementary Figure 6.** Conformational changes of  $\alpha_E\beta_E$  during the  $40^\circ$  rotation step. **a** Transparent  $\alpha_E\beta_E$  in *post-hyd* is superimposed with  $\alpha_E\beta_E$  in  $91^\circ$  at high [ATP].  $\alpha_E$  and  $\beta_E$  are colored orange and green respectively. Bound ADP and Pi are represented by spheres. **b** Transparent  $\alpha_E\beta_E$  in  $91^\circ$  is superimposed with  $\alpha_E\beta_E$  in  $101^\circ$  at high [ATP]. **c** Superimposition of  $\alpha_E$  in  $120^\circ$  (*light blue chain*) with  $\alpha_E$  in  $101^\circ$  (*pink chain*) and  $\alpha_E$  in  $91^\circ$  (*transparent pink chain*). **d** Transparent  $\alpha_E\beta_E$  in *post-hyd* superimposed with  $\alpha_E\beta_E$  in  $91^\circ$  at low [ATP]. **e** Transparent  $\alpha_E\beta_E$  in  $91^\circ$  superimposed with  $\alpha_E\beta_E$  in  $101^\circ$  at low [ATP]. **f** Bound Pi and coordinated amino acid residues in  $\alpha_E\beta_E$  of *post-hyd* with the density map.

## Supplementary Fig.7

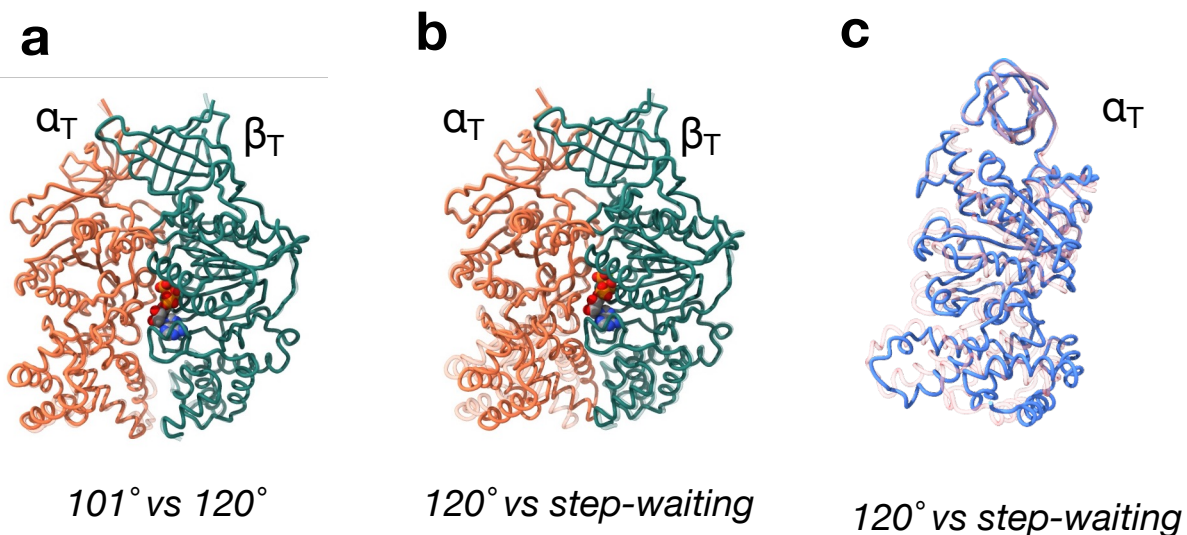

**Supplementary Figure 7.** Conformational changes of  $\alpha_T$  between  $120^\circ$  and *step-waiting*. **a** Transparent  $\alpha_T\beta_T$  in  $101^\circ$  is superimposed with  $\alpha_T\beta_T$  in  $120^\circ$ . The  $\alpha$  and  $\beta$  subunits are colored and green, respectively. Bound ATP is represented by spheres. **b** Transparent  $\alpha_T\beta_T$  in  $120^\circ$  is superimposed with  $\alpha_T\beta_T$  in *step-waiting*. **c** Superimposition of  $\alpha_T$  subunit in *step-waiting* (light blue chain) with  $\alpha$  subunit in  $120^\circ$  (transparent pink chain).

# Supplementary Fig.8

**a**

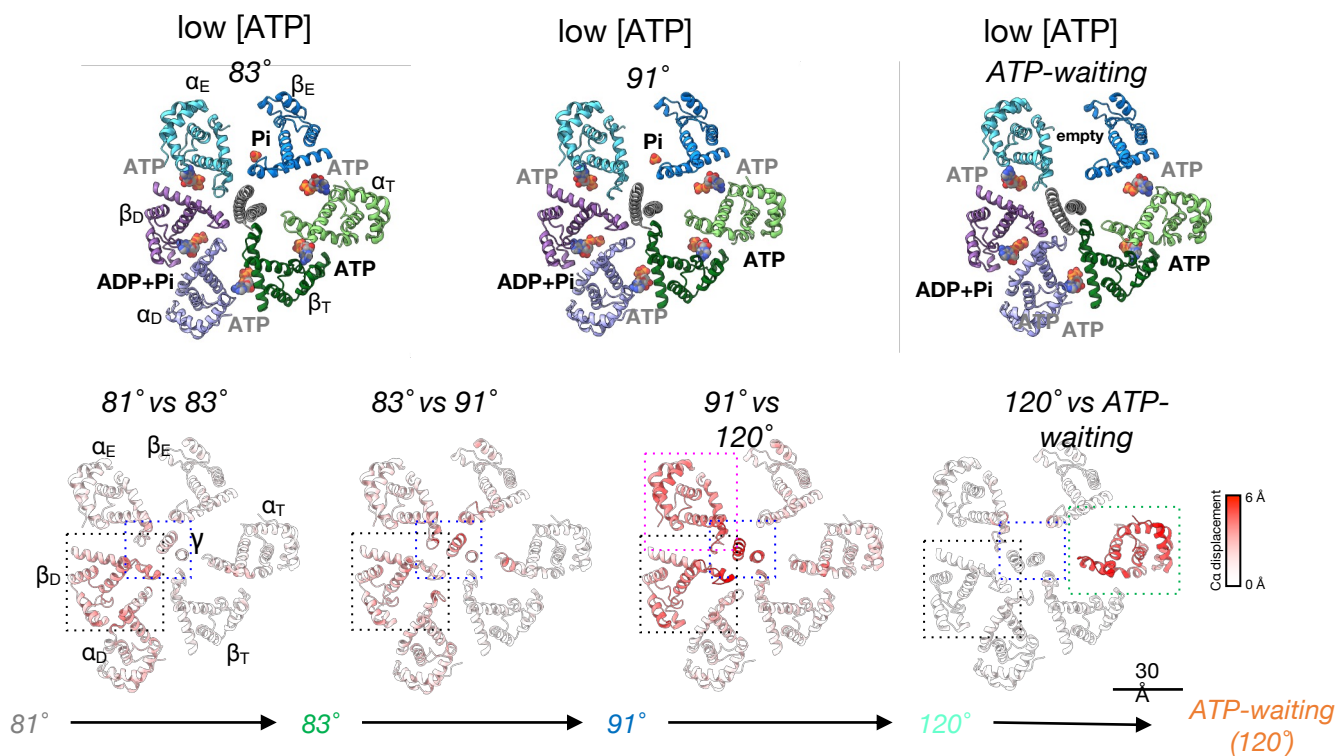

**b**

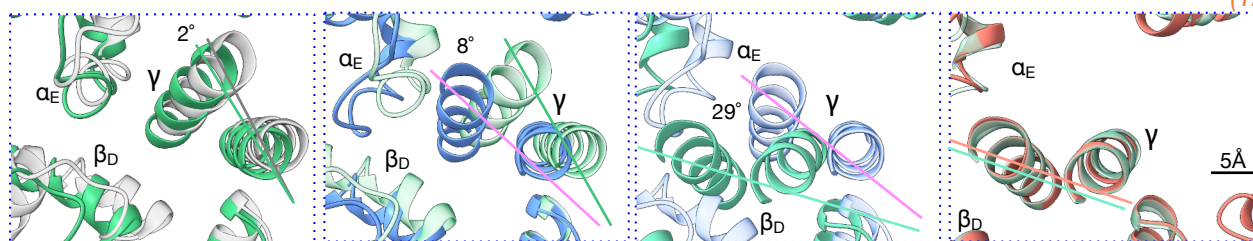

**c**

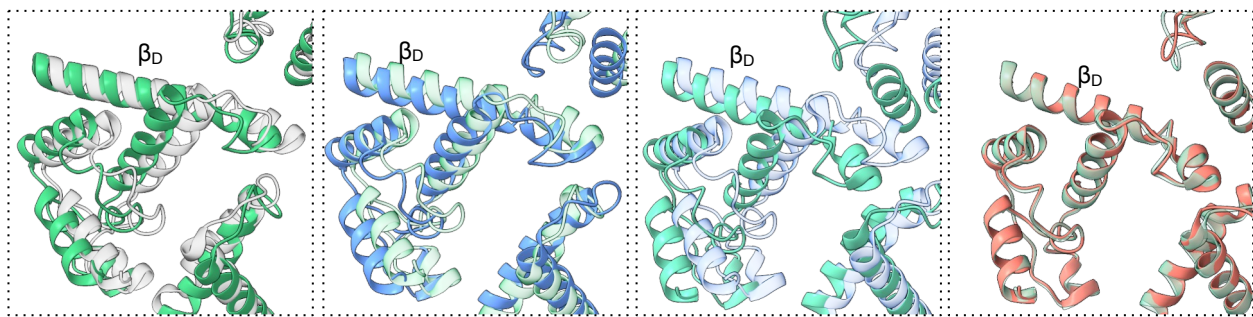

**d**

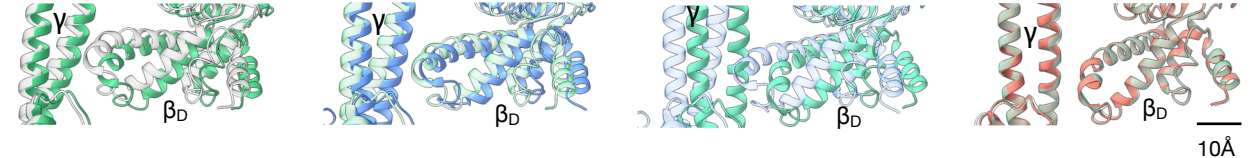

**e**

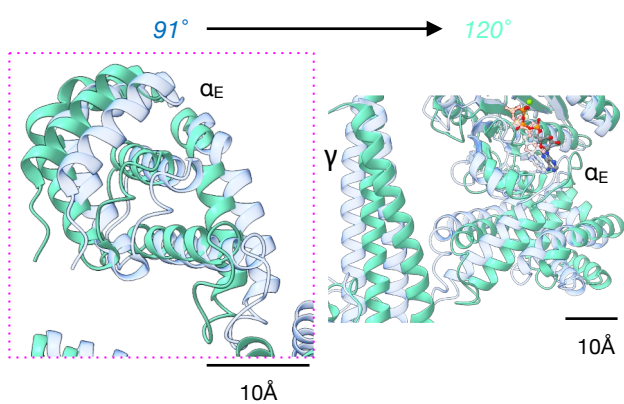

**f**

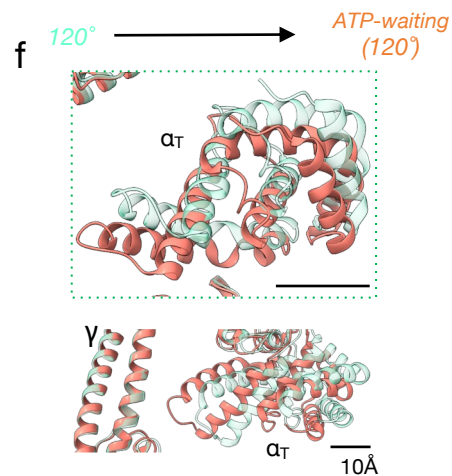

**Supplementary Figure 8. Structure comparison of 5 intermediates captured during the 40° step at low [ATP].** **a** *upper*, Cross section of the F<sub>1</sub> domain showing nucleotide occupancy in the catalytic sites. *lower*, 81°, *post-hyd*, 91°, 120°, and *ATP-waiting* structures are arranged from left to right. The Ca displacement relative to the next structure (*right side*) is indicated by the red-white color gradient. The dashed square indicates the area of this figure shown in the zoomed in view in **b-f**. **b-f** Comparison of each structure to the following one. **b** compares the  $\gamma$  subunit and its surroundings, and the different rotation angles between each  $\gamma$  subunit and that of the next structure are indicated by different colored lines. **c** shows an upper view of  $\beta_D$ , **d** compares  $\beta_D$  from a side view, Panels **e** and **f** compare to  $\alpha_T$  and  $\alpha_E$ , respectively. Each cartoon chain is colored as 81°(grey), 83°(green), 91°(blue), 120°(light green), and *ATP-waiting* (orange).

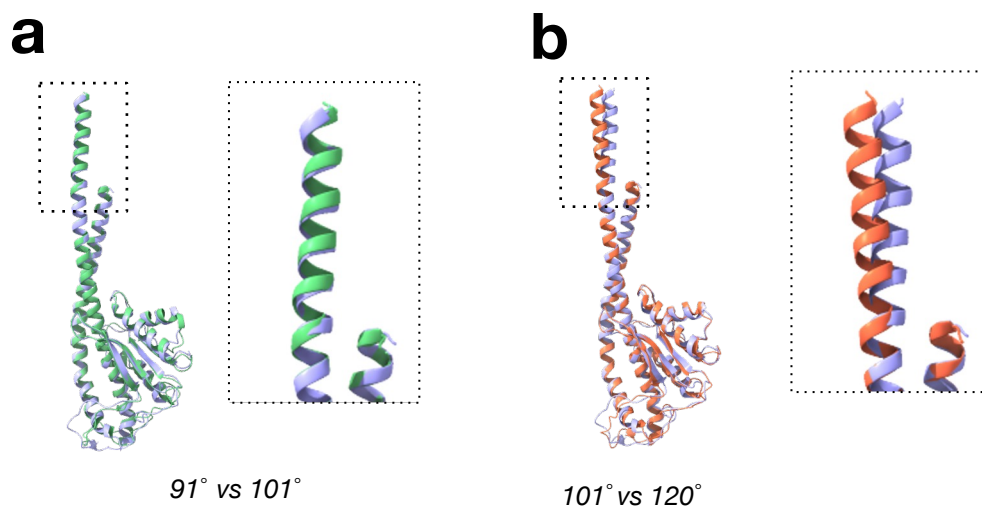

**Supplementary Figure 9.** Conformational changes of  $\gamma$  subunit between  $91^\circ$ (green) and  $101^\circ$ (blue) (**a**), and  $101^\circ$  and  $120^\circ$ (orange) (**b**). The magnified views of the C termini helices are shown in the right panels, respectively.



Supplementary Fig.10

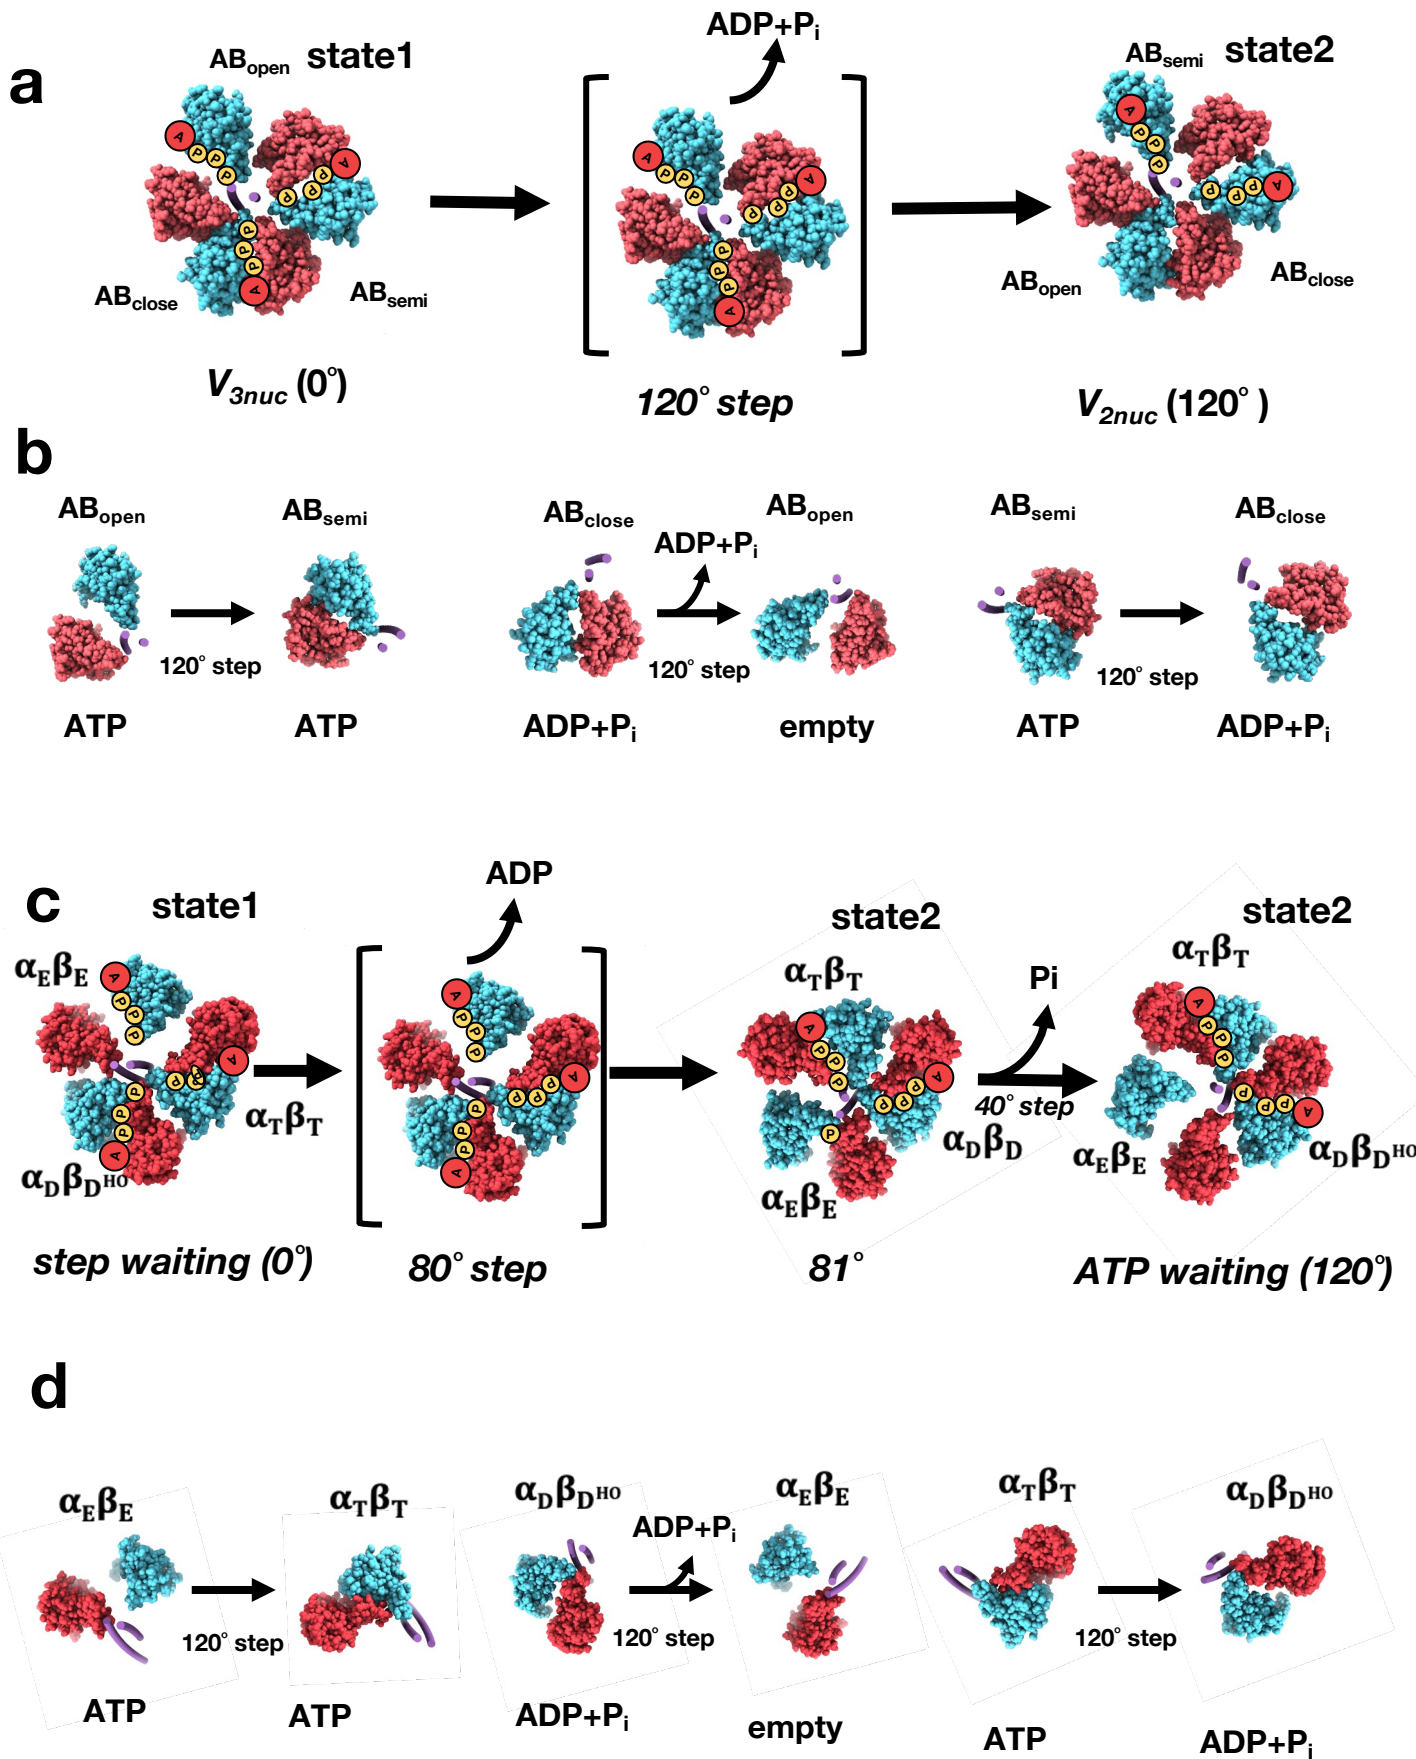

**Supplementary Figure 10.** Rotation schemes of rotary ATPases. **a** Structural change of the  $V_1$  domain in V/A-ATPase during a complete  $120^\circ$  rotation.  $V_{3nuc}$ , generated by binding of ATP to  $V_{2nuc}$  in state 1, initiates the  $120^\circ$  rotation, resulting in  $V_{2nuc}$  in state 2. **b** Three catalytic events occur simultaneously at the three catalytic sites; closure of  $AB_{open}$  caused by binding of ATP, release of ADP and Pi from  $AB_{closed}$  by an opening motion of  $AB_{closed}$ , and hydrolysis of ATP in  $AB_{semi}$ , coupled with the  $120^\circ$  rotation of the central DF stalk. **c** Structural changes for  $F_1$  domain in  $F_oF_1$  during the  $120^\circ$  step. **d** During the  $120^\circ$  rotation of the  $\gamma$  subunit, three catalytic events also occur simultaneously at the three catalytic sites; closure of  $\alpha_E\beta_E$  caused by binding of ATP, release of ADP and Pi from  $\alpha_D\beta_D$  by an opening motion of  $\alpha_D\beta_D$ , and hydrolysis of ATP in  $\alpha_T\beta_T$ .

**Supplementary Table 1** RMSD values for F<sub>1</sub> domain of each structure. The F<sub>1</sub> domains were superimposed on the  $\beta$ /10-80 a.a. and  $\alpha$ /30-90 a.a., then the values for the backbone of F<sub>1</sub> domain were calculated using UCSF ChimeraX software.

| low [ATP] \ high [ATP] | <b>81°</b> | <i>post-hyd</i> | <b>91°</b> | <b>101°</b> | <b>120°</b> | <i>step-waiting</i> |
|------------------------|------------|-----------------|------------|-------------|-------------|---------------------|
| <b>81°</b>             | 0.79       | 1.25            | 2.00       | 2.71        | 2.77        | 2.71                |
| <i>post-hyd</i>        | 1.01       | 1.08            | 1.85       | 2.43        | 2.48        | 3.22                |
| <b>91°</b>             | 1.57       | 1.41            | 1.68       | 1.99        | 2.01        | 2.84                |
| <b>101°</b>            |            |                 |            |             |             |                     |
| <b>120°</b>            | 2.69       | 2.55            | 2.36       | 1.38        | 0.77        | 1.82                |
| <i>ATP-waiting</i>     | 3.25       | 3.14            | 2.79       | 1.72        | 1.53        | 0.66                |

**Supplementary Table 2A** Cryo-EM data collection, refinement and validation statistics for F<sub>o</sub>F<sub>1</sub> at high [ATP]

|                                              | <i>81°</i>                     | <i>post-hyd</i>                    | <i>91°</i>                         | <i>101°</i>                        | <i>120°</i>                        | <i>step waiting</i>                |
|----------------------------------------------|--------------------------------|------------------------------------|------------------------------------|------------------------------------|------------------------------------|------------------------------------|
| EMDB ID                                      | 34748                          | 34749                              | 34750                              | 34751                              | 34752                              | 34753                              |
| PDB ID                                       | 8HH1                           | 8HH2                               | 8HH3                               | 8HH4                               | 8HH5                               | 8HH6                               |
| <b>Data collection and processing</b>        |                                |                                    |                                    |                                    |                                    |                                    |
| Magnification                                | 81,000                         | 81,000                             | 81,000                             | 81,000                             | 81,000                             | 81,000                             |
| Voltage(kV)                                  | 300                            | 300                                | 300                                | 300                                | 300                                | 300                                |
| Microscope                                   | Titan Krios                    | Titan Krios                        | Titan Krios                        | Titan Krios                        | Titan Krios                        | Titan Krios                        |
| Total dose (e <sup>-</sup> /Å <sup>2</sup> ) | 60                             | 60                                 | 60                                 | 60                                 | 60                                 | 60                                 |
| Pixel size(Å/pix)                            | 0.88                           | 0.88                               | 0.88                               | 0.88                               | 0.88                               | 0.88                               |
| Defocus range(µm)                            | -0.8 to -2.0                   | -0.8 to -2.0                       | -0.8 to -2.0                       | -0.8 to -2.0                       | -0.8 to -2.0                       | -0.8 to -2.0                       |
| symmetry imposed                             | C1                             | C1                                 | C1                                 | C1                                 | C1                                 | C1                                 |
| Initial particle                             | 1,118,093                      | 1,118,093                          | 1,118,093                          | 1,118,093                          | 1,118,093                          | 1,118,093                          |
| Final Particle                               | 36,916                         | 19,470                             | 6,516                              | 15,893                             | 14,694                             | 26,536                             |
| Map resolution(Å)                            | 2.9                            | 3.0                                | 4.3                                | 3.1                                | 2.9                                | 2.9                                |
| FSC threshold                                | 0.143                          | 0.143                              | 0.143                              | 0.143                              | 0.143                              | 0.143                              |
| <b>Refinement</b>                            |                                |                                    |                                    |                                    |                                    |                                    |
| Initial model used                           | This study                     | This study                         | This study                         | This study                         | This study                         | This study                         |
| Model resolution                             | 2.9                            | 3.1                                | 4.3                                | 3.3                                | 3.2                                | 3.2                                |
| FSC threshold                                | 0.5                            | 0.5                                | 0.5                                | 0.5                                | 0.5                                | 0.5                                |
| <b>Model composition</b>                     |                                |                                    |                                    |                                    |                                    |                                    |
| Nonhydrogen atoms                            | 24280                          | 24282                              | 24288                              | 24284                              | 24284                              | 24284                              |
| Protein residues                             | 3129                           | 3129                               | 3129                               | 3129                               | 3129                               | 3129                               |
| Ligands                                      | 5MG,6ATP,<br>,1PO <sub>4</sub> | 5MG,5ATP,<br>1ADP,2PO <sub>4</sub> | 5MG,5ATP,<br>1ADP,2PO <sub>4</sub> | 6MG,5ATP,<br>1ADP,1PO <sub>4</sub> | 6MG,5ATP,<br>1ADP,1PO <sub>4</sub> | 6MG,5ATP,<br>1ADP,1PO <sub>4</sub> |
| <b>R.m.s deviations</b>                      |                                |                                    |                                    |                                    |                                    |                                    |
| Bond length (Å)                              | 0.002                          | 0.004                              | 0.003                              | 0.004                              | 0.003                              | 0.002                              |
| Bond Angles (°)                              | 0.54                           | 0.647                              | 0.617                              | 0.646                              | 0.609                              | 0.585                              |
| <b>Validation</b>                            |                                |                                    |                                    |                                    |                                    |                                    |
| MolProbity score                             | 1.19                           | 1.22                               | 1.92                               | 1.43                               | 1.35                               | 1.32                               |
| EMRinger score                               | 3.96                           | 3.2                                | 1.03                               | 3.01                               | 3.47                               | 3.28                               |
| Clashscore                                   | 4.1                            | 4.06                               | 10.3                               | 4.12                               | 5.62                               | 4.98                               |
| Rotamer outlier (%)                          | 0                              | 0.51                               | 0.12                               | 0.04                               | 0                                  | 0                                  |
| CaBAlM outlier (%)                           | 1.61                           | 1.84                               | 2.87                               | 2.26                               | 1.68                               | 1.84                               |
| <b>Ramachandran plot</b>                     |                                |                                    |                                    |                                    |                                    |                                    |
| Favored (%)                                  | 98.11                          | 97.88                              | 94.35                              | 96.44                              | 97.78                              | 97.72                              |
| Allowed (%)                                  | 1.93                           | 2.05                               | 5.65                               | 3.53                               | 2.18                               | 2.28                               |
| Disallowed (%)                               | 0                              | 0.06                               | 0                                  | 0.03                               | 0                                  | 0                                  |

**Supplementary Table 2B** Cryo-EM data collection, refinement and validation statistics for F<sub>o</sub>F<sub>1</sub> at low [ATP]

|                                              | <i>81°</i>                     | <i>post-hyd</i>                    | <i>Post-hyd'</i>                   | <i>91°</i>                         | <i>120°</i>                        | <i>step waiting</i>                |
|----------------------------------------------|--------------------------------|------------------------------------|------------------------------------|------------------------------------|------------------------------------|------------------------------------|
| EMDB ID                                      | 34754                          | 34755                              | 34760                              | 34756                              | 34757                              | 34758                              |
| PDB ID                                       | 8HH7                           | 8HH8                               | 8HHC                               | 8HH9                               | 8HHA                               | 8HHB                               |
| <b>Data collection and processing</b>        |                                |                                    |                                    |                                    |                                    |                                    |
| Magnification                                | 81,000                         | 81,000                             | 81,000                             | 81,000                             | 81,000                             | 81,000                             |
| Voltage(kV)                                  | 300                            | 300                                | 300                                | 300                                | 300                                | 300                                |
| Microscope                                   | Titan Krios                    | Titan Krios                        | Titan Krios                        | Titan Krios                        | Titan Krios                        | Titan Krios                        |
| Total dose (e <sup>-</sup> /Å <sup>2</sup> ) | 60                             | 60                                 | 60                                 | 60                                 | 60                                 | 60                                 |
| Pixel size(Å/pix)                            | 0.88                           | 0.88                               | 0.88                               | 0.88                               | 0.88                               | 0.88                               |
| Defocus range(μm)                            | -0.8 to -2.0                   | -0.8 to -2.0                       | -0.8 to -2.0                       | -0.8 to -2.0                       | -0.8 to -2.0                       | -0.8 to -2.0                       |
| symmetry imposed                             | C1                             | C1                                 | C1                                 | C1                                 | C1                                 | C1                                 |
| Initial particle                             | 2,654,860                      | 2,654,860                          | 2,654,860                          | 2,654,860                          | 2,654,860                          | 2,654,860                          |
| Final Particle                               | 119,152                        | 82,415                             | 26,578                             | 16,437                             | 13,133                             | 7,818                              |
| Map resolution(Å)                            | 2.5                            | 2.8                                | 3.3                                | 3.6                                | 3.4                                | 3.5                                |
| FSC threshold                                | 0.143                          | 0.143                              | 0.143                              | 0.143                              | 0.143                              | 0.143                              |
| <b>Refinement</b>                            |                                |                                    |                                    |                                    |                                    |                                    |
| Initial model used                           | This study                     | This study                         | This study                         | This study                         | This study                         | This study                         |
| Model resolution                             | 2.7                            | 3                                  | 3.4                                | 3.6                                | 3.5                                | 3.5                                |
| FSC threshold                                | 0.5                            | 0.5                                | 0.5                                | 0.5                                | 0.5                                | 0.5                                |
| <b>Model composition</b>                     |                                |                                    |                                    |                                    |                                    |                                    |
| Nonhydrogen atoms                            | 24280                          | 24282                              | 24288                              | 24284                              | 24284                              | 24284                              |
| Protein residues                             | 3129                           | 3129                               | 3129                               | 3129                               | 3129                               | 3129                               |
| Ligands                                      | 5MG,6ATP,<br>,1PO <sub>4</sub> | 5MG,5ATP,<br>1ADP,2PO <sub>4</sub> | 5MG,5ATP,<br>1ADP,2PO <sub>4</sub> | 6MG,5ATP,<br>1ADP,1PO <sub>4</sub> | 6MG,5ATP,<br>1ADP,1PO <sub>4</sub> | 6MG,5ATP,<br>1ADP,1PO <sub>4</sub> |
| <b>R.m.s deviations</b>                      |                                |                                    |                                    |                                    |                                    |                                    |
| Bond length (Å)                              | 0.002                          | 0.004                              | 0.003                              | 0.004                              | 0.003                              | 0.002                              |
| Bond Angles (°)                              | 0.54                           | 0.647                              | 0.617                              | 0.646                              | 0.609                              | 0.585                              |
| <b>Validation</b>                            |                                |                                    |                                    |                                    |                                    |                                    |
| MolProbity score                             | 1.19                           | 1.22                               | 1.92                               | 1.43                               | 1.35                               | 1.32                               |
| EMRinger score                               | 3.96                           | 3.2                                | 1.03                               | 3.01                               | 3.47                               | 3.28                               |
| Clashscore                                   | 4.1                            | 4.06                               | 10.3                               | 4.12                               | 5.62                               | 4.98                               |
| Rotamer outlier (%)                          | 0                              | 0.51                               | 0.12                               | 0.04                               | 0                                  | 0                                  |
| CaBALM outlier (%)                           | 1.61                           | 1.84                               | 2.87                               | 2.26                               | 1.68                               | 1.84                               |
| <b>Ramachandran plot</b>                     |                                |                                    |                                    |                                    |                                    |                                    |
| Favored (%)                                  | 98.11                          | 97.88                              | 94.35                              | 96.44                              | 97.78                              | 97.72                              |
| Allowed (%)                                  | 1.93                           | 2.05                               | 5.65                               | 3.53                               | 2.18                               | 2.28                               |
| Disallowed (%)                               | 0                              | 0.06                               | 0                                  | 0.03                               | 0                                  | 0                                  |
