# Supplementary material for: Mechanism of ATP hydrolysis dependent rotation of bacterial ATP synthase
Source: PubMed Central journal article supplement (PMC10333338; doi:10.1038/s41467-023-39742-5), 2023-07-10
Supplement: 41467_2023_39742_MOESM3_ESM.pdf [file 41467_2023_39742_MOESM3_ESM.pdf]

## **Description of Additional Supplementary Files**

Supplementary movie 1. Structural changes in F<sub>1</sub> domain during 120° step.
